# Supplementary material
Source: PubMed Central journal article supplement (PMC4465789)
Supplement: NIHMS673942-supplement-Supplemental_Information.pdf [file NIHMS673942-supplement-Supplemental_Information.pdf]

**Antinociceptive activity of extracts and secondary metabolites from wild growing and micropropagated plants of *Renealmia alpinia***

**Isabel Gómez-Betancur,<sup>1\*</sup> Dora Benjumea,<sup>1</sup> Edison Osorio,<sup>2</sup> Natalie Cortés,<sup>2</sup> Francisco León,<sup>3</sup> and Stephen J. Cutler<sup>3</sup>**

<sup>1</sup> Programa de Ofidismo/Escorpionismo, Sede de Investigación Universitaria - SIU, Torre 2 Lab 631. Facultad de Química Farmacéutica, Universidad de Antioquia; Calle 70 No. 52-21, Medellín, Colombia

<sup>2</sup> Grupo de Investigación en Sustancias Bioactivas, Facultad de Química farmacéutica, Universidad de Antioquia. Medellín, Colombia

<sup>3</sup> Department of BioMolecular Sciences, Division of Medicinal Chemistry, School of Pharmacy, The University of Mississippi, University, MS, 38677, USA

\* Correspondence to: Isabel Gómez, Sede de Investigación Universitaria - SIU, Torre 2 Lab 631. Facultad de Química Farmacéutica, Universidad de Antioquia; Calle 70 No. 52-21, Medellín, Colombia.

Email: [isabel.gomez@udea.edu.co](mailto:isabel.gomez@udea.edu.co) Phone: (57)-4-2196649 Fax: (57)-4- 2631914

R-9-4-3  
Proton

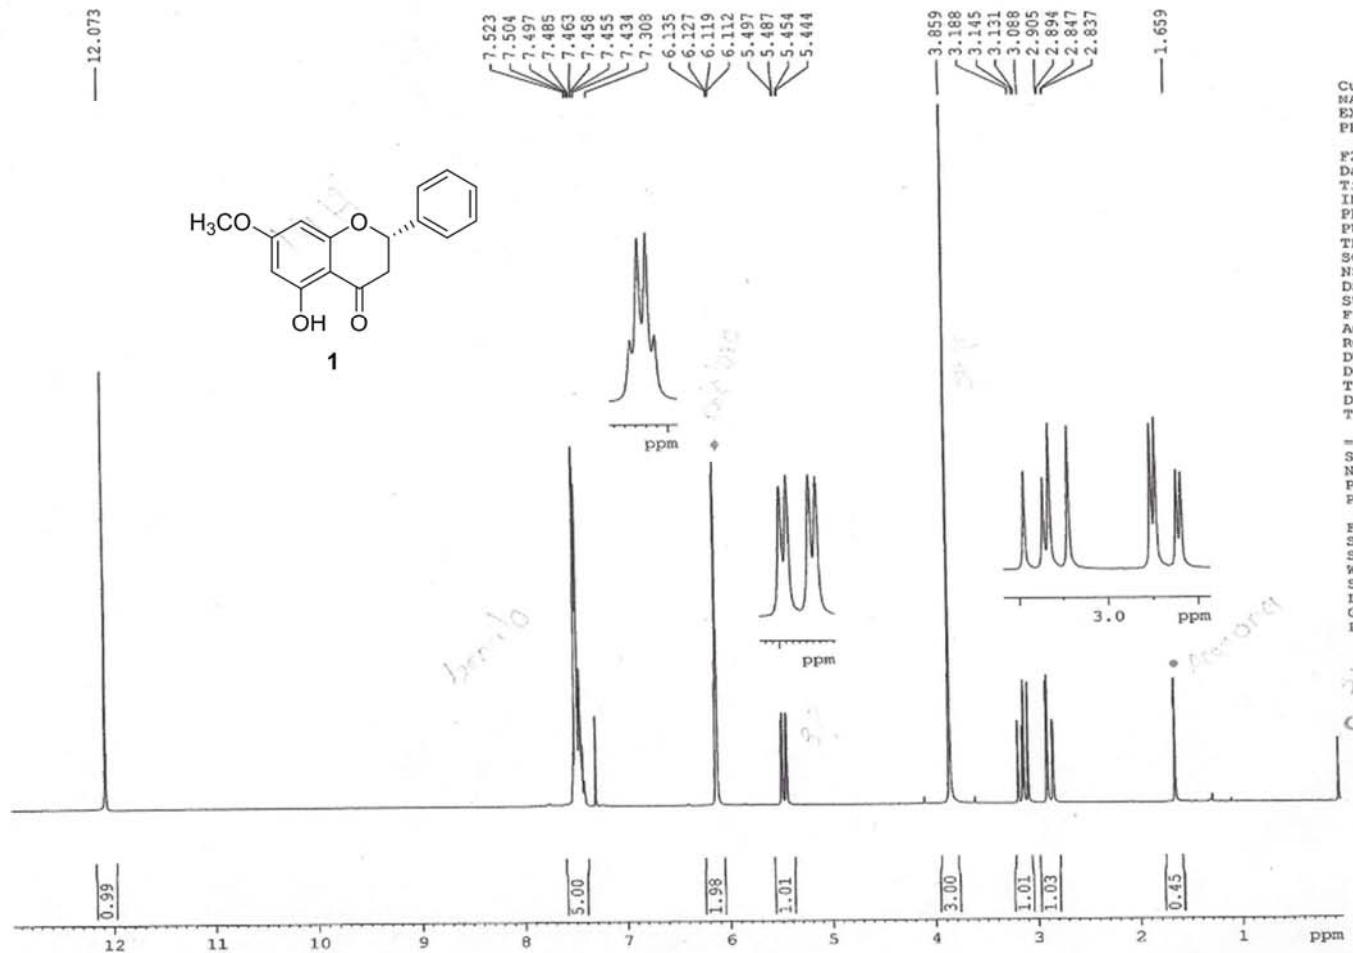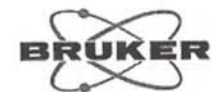

Current Data Parameters  
NAME GISB-R-9-4-3  
EXPNO 1  
PROCNO 1

F2 - Acquisition Parameters  
Date\_ 20130408  
Time 12.50  
INSTRUM FOURIER300  
PROBHD 5 mm DUL 13C-1  
PULPROG zg30  
TD 65536  
SOLVENT CDCl3  
NS 16  
DS 0  
SWH 6103.516 Hz  
FIDRES 0.093132 Hz  
AQ 5.3687091 sec  
RG 31.623  
DW 81.920 usec  
DE 6.50 usec  
TE 296.2 K  
D1 1.00000000 sec  
TDO 1

===== CHANNEL f1 =====  
SFO1 300.1698537 MHz  
NUC1 1H  
P1 12.50 usec  
PLW1 11.99499989 W

F2 - Processing parameters  
SI 65536  
SF 300.1680000 MHz  
WDW EM  
SSB 0  
LB 0.30 Hz  
GB 0  
PC 1.00

Fig. 15 <sup>1</sup>H NMR of compound 1 in CDCl<sub>3</sub>.

R-9-4-3  
13C jmod

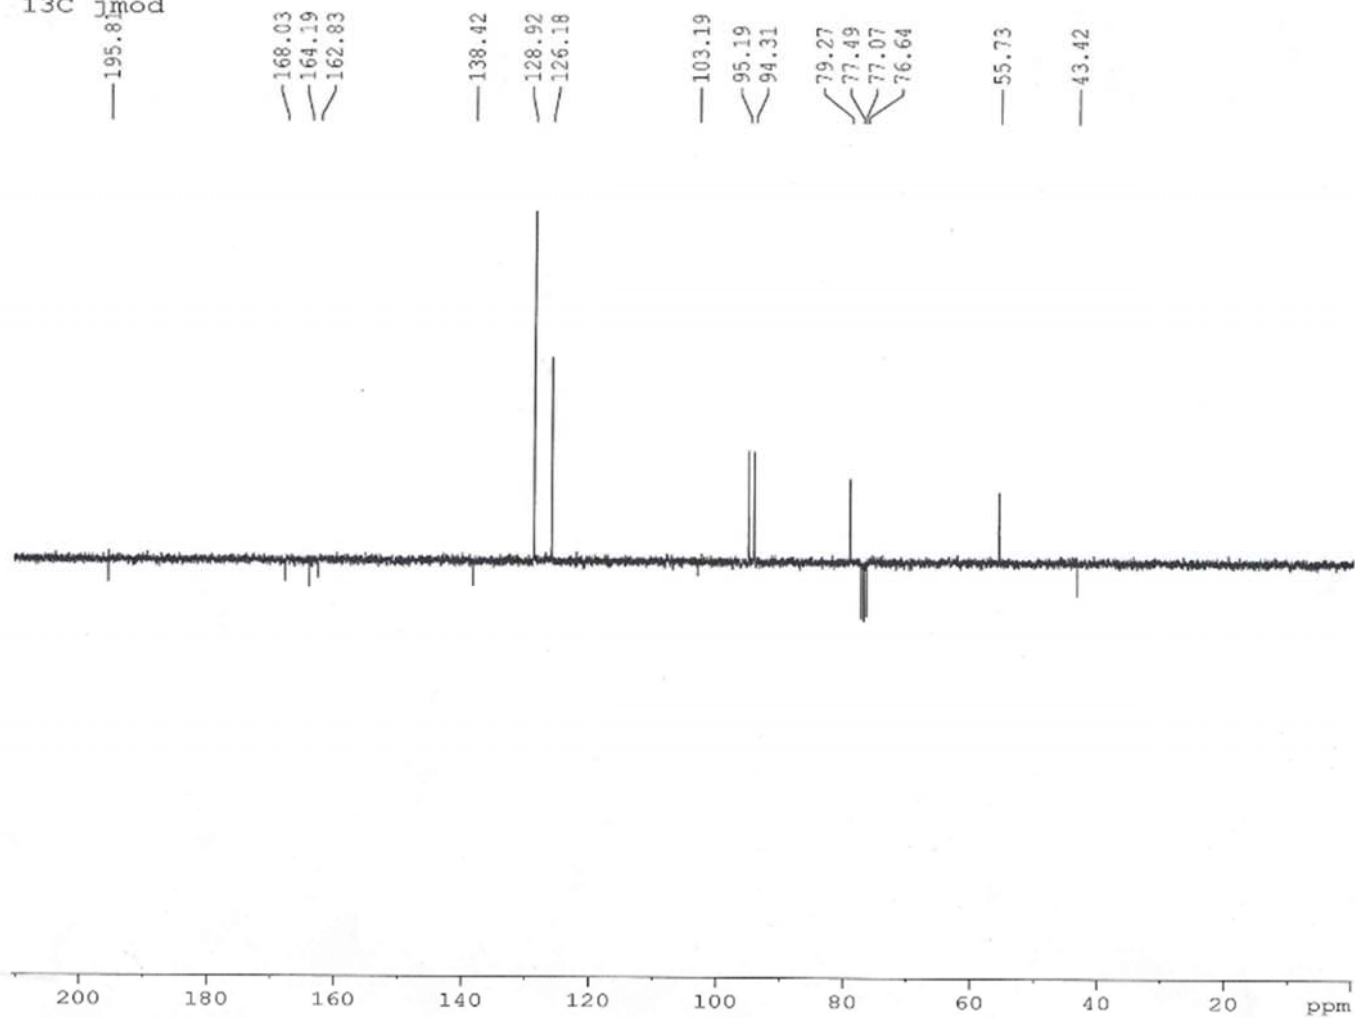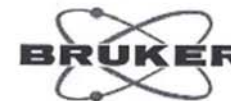

```
Current Data Parameters
NAME      G188-R-9-4-3
EXPNO     5
PROCNO    1

F2 - Acquisition Parameters
Date_     20130408
Time      13.28
INSTRUM   FOURIER300
PROBHD    5 mm DUL 13C-1
PULPROG   zgpg30
TD         32768
SOLVENT   CDCl3
NS         256
DS         4
SWH        24414.063 Hz
FIDRES     0.745050 Hz
AQ         0.6710886 sec
RG         501.187
DN         20.480 usec
DE         6.50 usec
TE         296.1 K
CNST2     145.0000000
D1         2.00000000 sec
D2         0.00344828 sec
D4         0.00172414 sec
D11        0.03000000 sec
D30        0.00001250 sec
D33        0.00001250 sec
D40        0.02432100 sec
D42        0.00002500 sec
D44        0.00002500 sec
L4         17
L5         49
P1         12.50 usec
P32        105.00 usec
TD0        1

----- CHANNEL f1 -----
SFO1      75.4848517 MHz
NUC1       13C
P0         12.50 usec
P2         25.00 usec
PLW1      25.00300026 W

----- CHANNEL f2 -----
SFO2      300.1692007 MHz
NUC2       1H
CPDPRG[2] waltz16
P3         12.50 usec
P4         25.00 usec
PCPD2     105.00 usec
PLW2      11.99499989 W
PLW12     0.17000000 W

F2 - Processing parameters
SI         32768
SF         75.4773040 MHz
MCH        EM
SSB        0
LB         1.00 Hz
GB         0
PC         1.40
```

Fig. 2S <sup>13</sup>C J-MOD experiment of compound 1 in CDCl<sub>3</sub>.

RA-5-2  
Proton

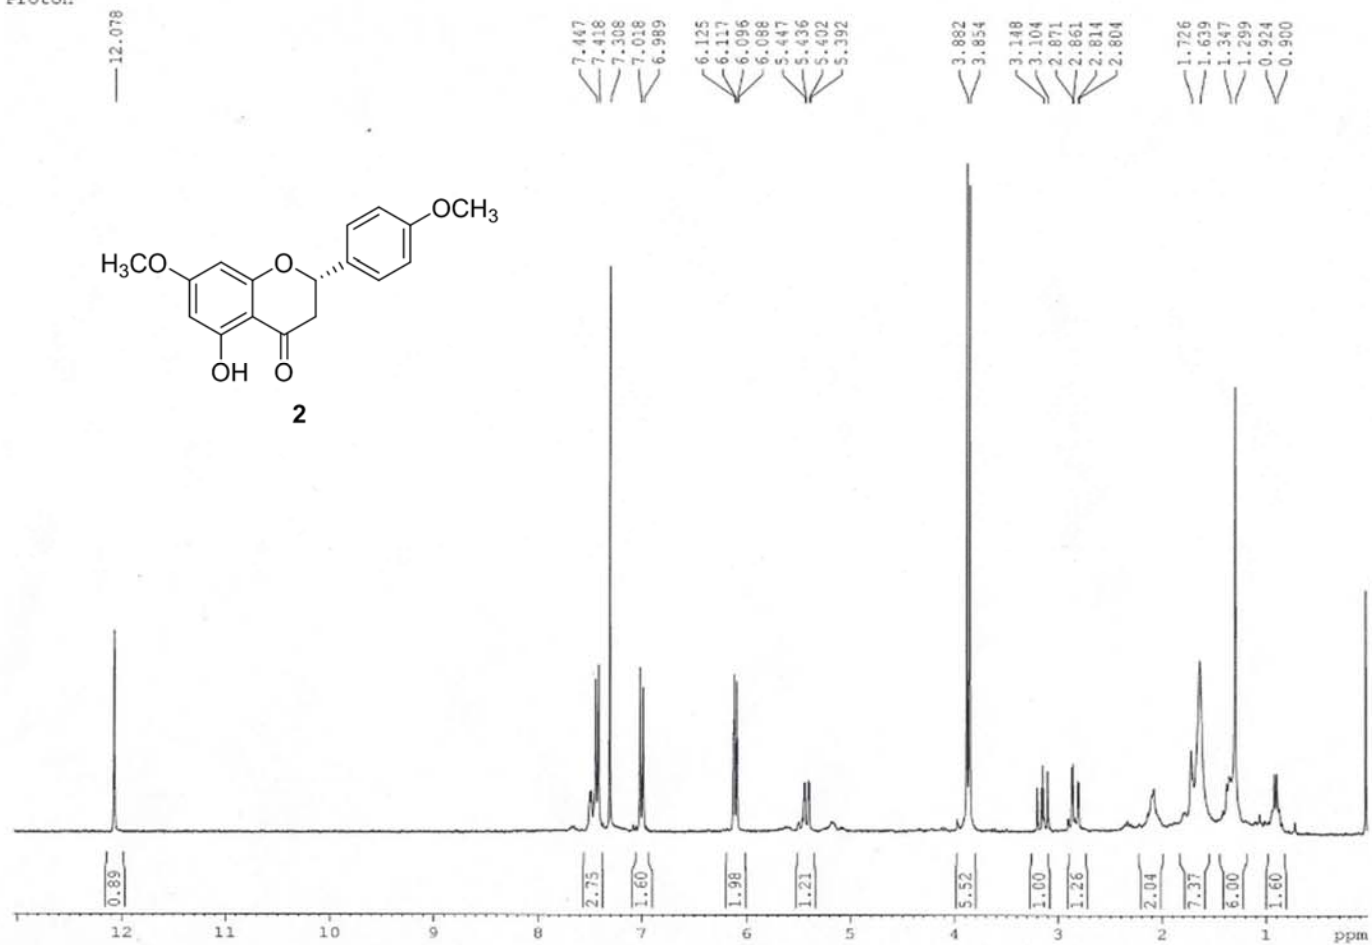

**BRUKER**

Current Data Parameters  
NAME GISB-RA-5-2  
EXFNO 1  
PROCNO 1

F2 - Acquisition Parameters  
Date\_ 20130708  
Time\_ 15.42  
INSTRUM FOURIER300  
PROBHD 5 mm DUL 13C-1  
PULPROG zg30  
TD 65536  
SOLVENT CDCl3  
NS 16  
DS 0  
SWH 6103.516 Hz  
FIDRES 0.093132 Hz  
AQ 5.3687091 sec  
RG 101.088  
DW 81.920 usec  
DE 6.50 usec  
TE 296.1 K  
D1 1.00000000 sec  
TDO 1

----- CHANNEL f1 -----  
SFO1 300.1698537 MHz  
NUC1 1H  
P1 12.50 usec  
PLW1 11.99499989 W

F2 - Processing parameters  
SI 65536  
SF 300.1680000 MHz  
WDW EM  
SSB 0  
LB 0.30 Hz  
GB 0  
PC 1.00

Fig. 35 <sup>1</sup>H NMR of compound 2 in CDCl<sub>3</sub>.

RA-5-2  
13C normal

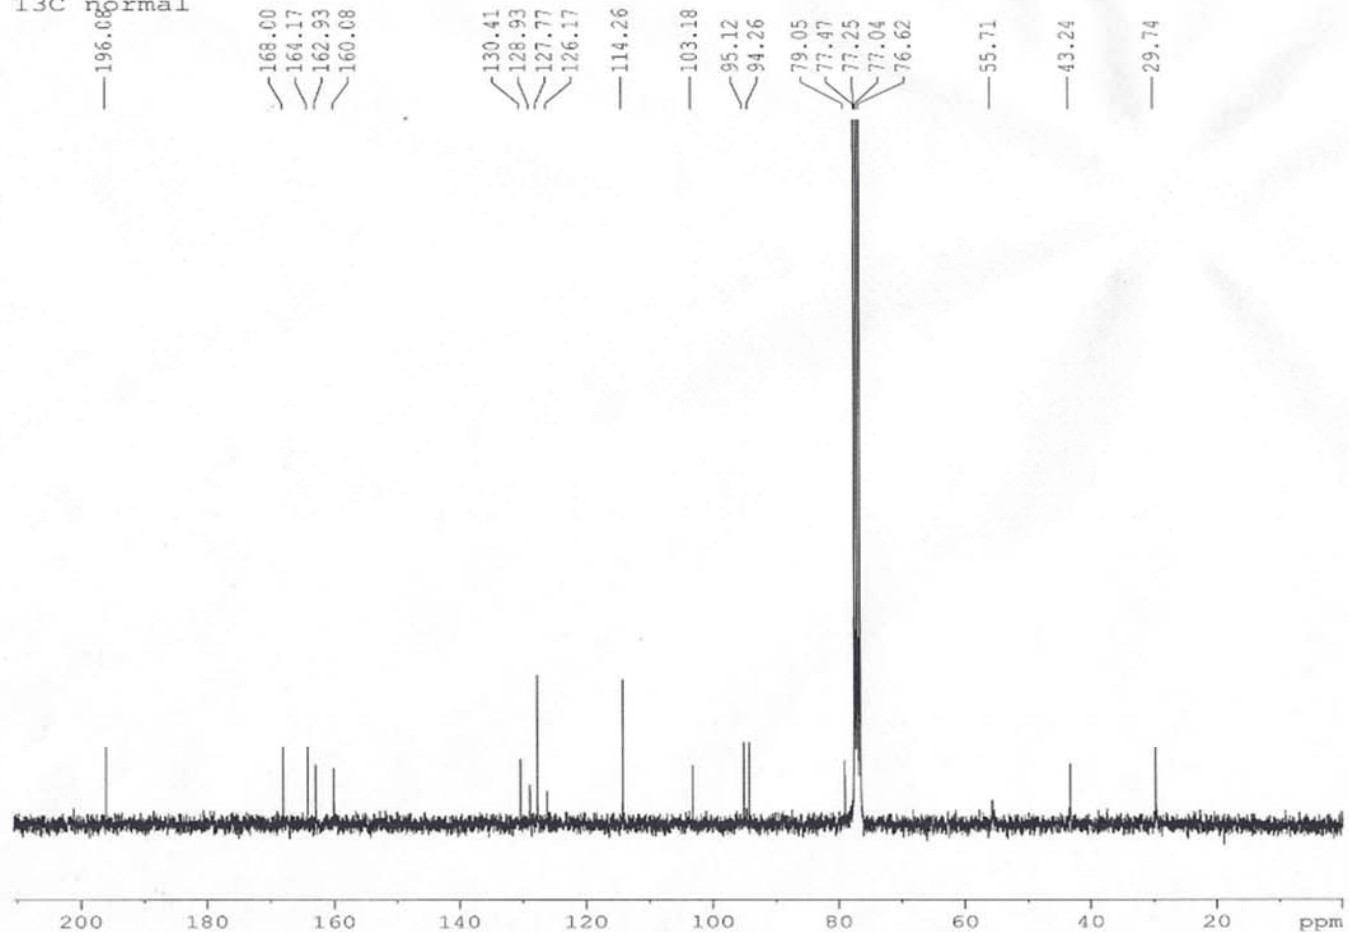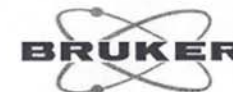

```
Current Data Parameters
NAME      GISB-RA-5-2
EXPNO     6
PROCNO    1

F2 - Acquisition Parameters
Date_     20130708
Time      22.44
INSTRUM   FOURIER300
PROBHD    5 mm DUL 13C-1
PULPROG   zgpg30
TD         32768
SOLVENT   CDCl3
NS         11910
DS         4
SWH        24414.063 Hz
FIDRES     0.745058 Hz
AQ         0.6710886 sec
RG         501.187
DW         20.480 usec
DE         6.50 usec
TE         296.2 K
D1         2.00000000 sec
D11        0.03000000 sec
D31        0.00001250 sec
D40        0.02432300 sec
L4         18
L5         49
P32        105.00 usec
TD0        1

----- CHANNEL f1 -----
SFO1      75.4848517 MHz
NUC1      13C
P1         12.50 usec
PLW1      25.00300026 W

----- CHANNEL f2 -----
SFO2      300.1692007 MHz
NUC2      1H
CPDPRG[2] waltz16
PCPD2     105.00 usec
PLW2      11.99499989 W
PLW12     0.17000000 W
PLW13     0.18742000 W

F2 - Processing parameters
SI         32768
SF         75.4773040 MHz
WDW        EM
SSB        0
LB         1.00 Hz
GB         0
PC         1.40
```

Fig. 4S <sup>13</sup>C NMR of compound 2 in CDCl<sub>3</sub>.

R.A.G  
Proton

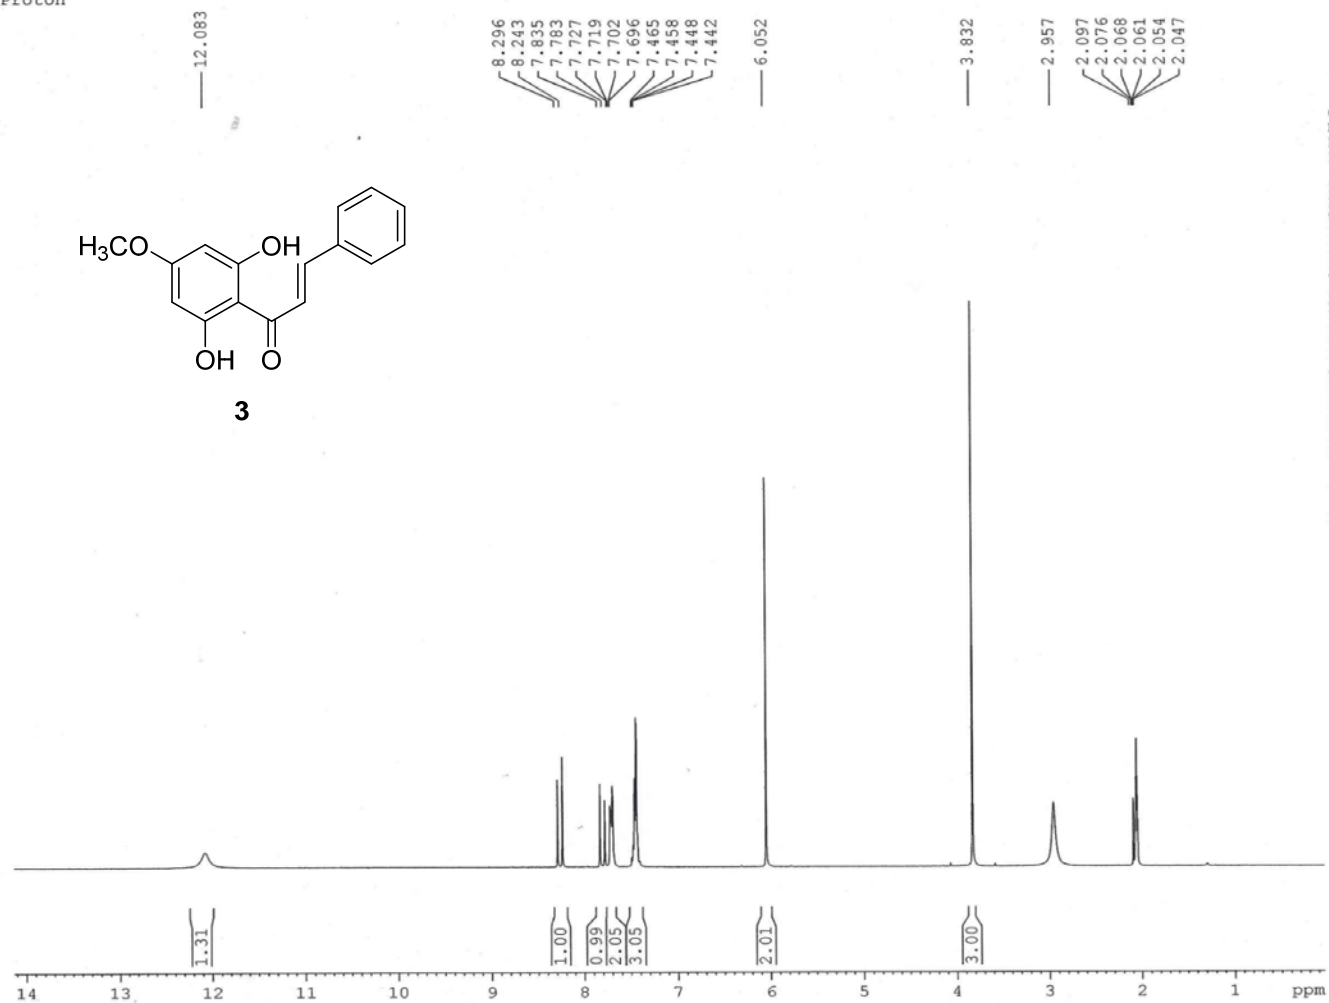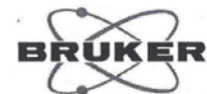

Current Data Parameters  
NAME GISB-RAG  
EXPNO 1  
PROCNO 1

F2 - Acquisition Parameters  
Date\_ 20130425  
Time 9.43  
INSTRUM FOURIER300  
PROBHD 5 mm DUL 13C-1  
PULPROG zg30  
TD 65536  
SOLVENT Acetone  
NS 16  
DS 0  
SWH 6103.516 Hz  
FIDRES 0.093132 Hz  
AQ 5.3687091 sec  
RG 67.2057  
DW 81.920 usec  
DE 6.50 usec  
TE 296.1 K  
D1 1.0000000 sec  
TDO 1

===== CHANNEL f1 =====  
SFO1 300.1698537 MHz  
NUC1 1H  
P1 12.50 usec  
PLW1 11.99499989 W

F2 - Processing parameters  
SI 65536  
SF 300.1680000 MHz  
WDW EM  
SSB 0  
LB 0.30 Hz  
GB 0  
PC 1.00

Fig. 5S <sup>1</sup>H NMR of compound 3 in CD<sub>3</sub>COCD<sub>3</sub>.

R.A.G  
13C normal

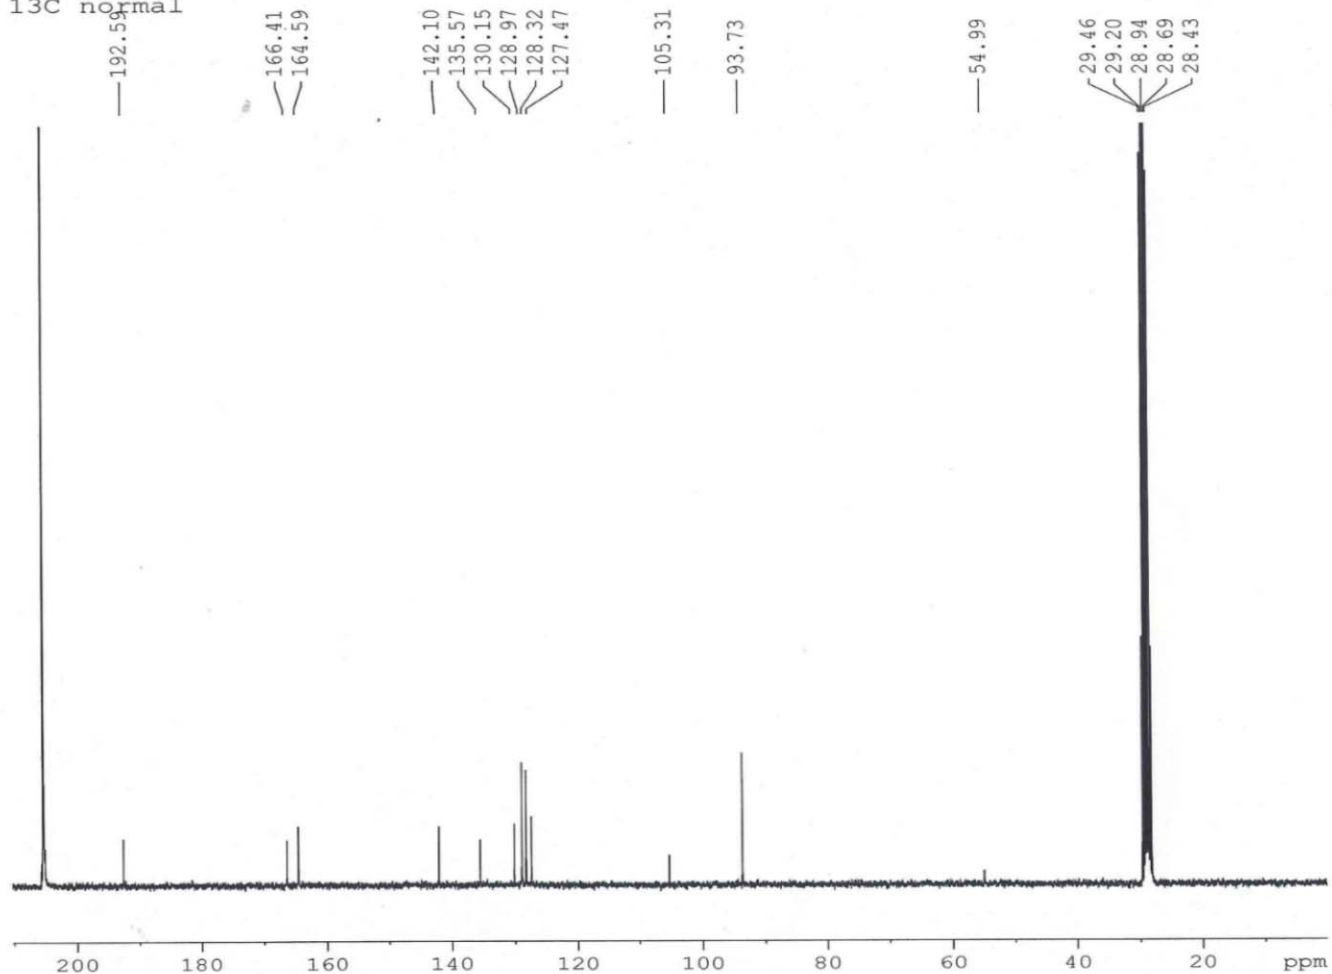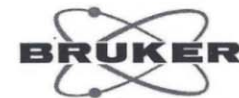

Current Data Parameters  
NAME GISB-RAG  
EXPNO 3  
PROCNO 1

F2 - Acquisition Parameters  
Date\_ 20130425  
Time 10.12  
INSTRUM FOURIER300  
PROBHD 5 mm DUL 13C-1  
PULPROG zgpg30  
TD 32768  
SOLVENT Acetone  
NS 2048  
DS 4  
SWH 24414.063 Hz  
FIDRES 0.745058 Hz  
AQ 0.6710886 sec  
RG 501.187  
DW 20.480 usec  
DE 6.50 usec  
TE 296.2 K  
D1 2.00000000 sec  
D11 0.03000000 sec  
D31 0.00001250 sec  
D40 0.02432300 sec  
L4 18  
L5 49  
P32 105.00 usec  
TD0 1

----- CHANNEL f1 -----  
SFO1 75.4848517 MHz  
NUC1 13C  
F1 12.50 usec  
PLW1 25.00300026 W

----- CHANNEL f2 -----  
SFO2 300.1692007 MHz  
NUC2 1H  
CPDPRG[2] waltz16  
PCPD2 105.00 usec  
PLW2 11.99499989 W  
PLW12 0.17000000 W  
PLW13 0.18742000 W

F2 - Processing parameters  
SI 32768  
SF 75.4773040 MHz  
WDW EM  
SSB 0  
LB 1.00 Hz  
GB 0  
PC 1.40

Fig. 6S <sup>13</sup>C NMR of compound 3 in CD<sub>3</sub>COCD<sub>3</sub>.

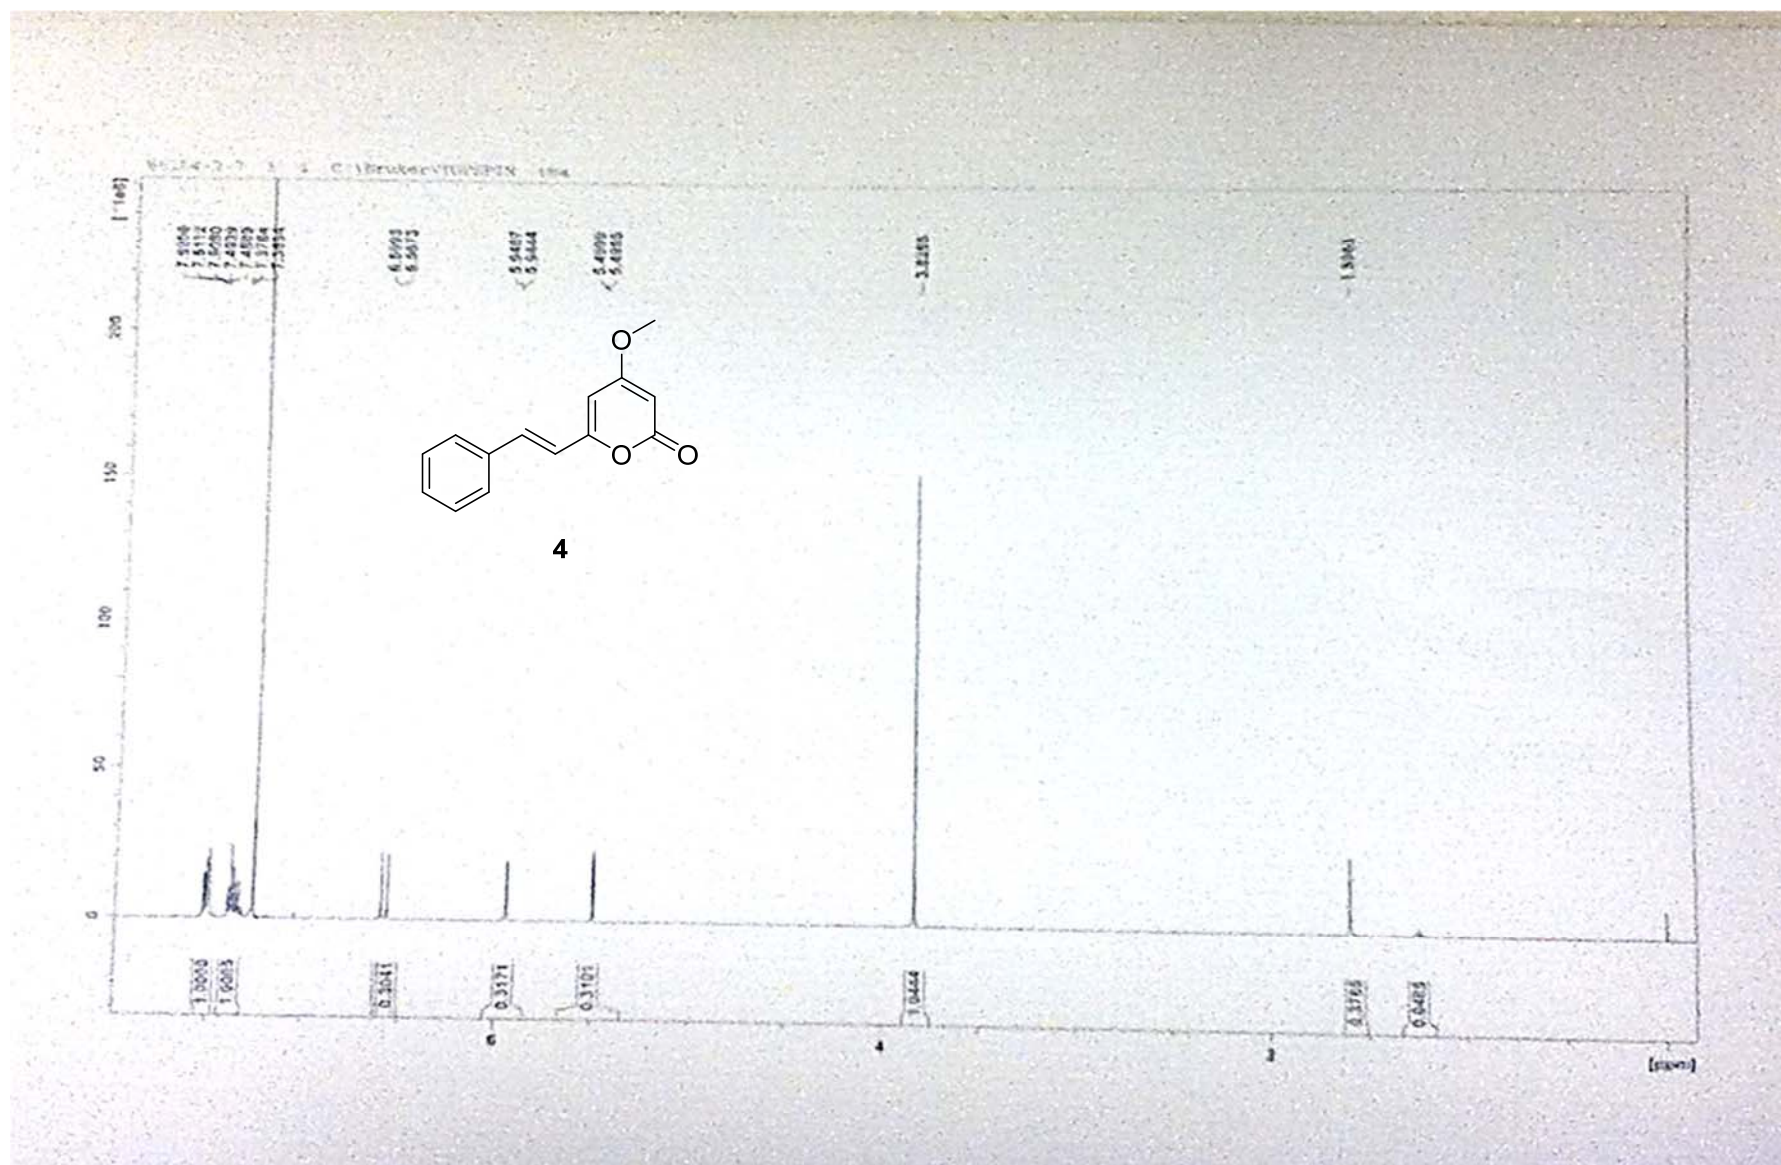

Fig. 7S <sup>1</sup>H NMR of compound **4** in CDCl<sub>3</sub>.



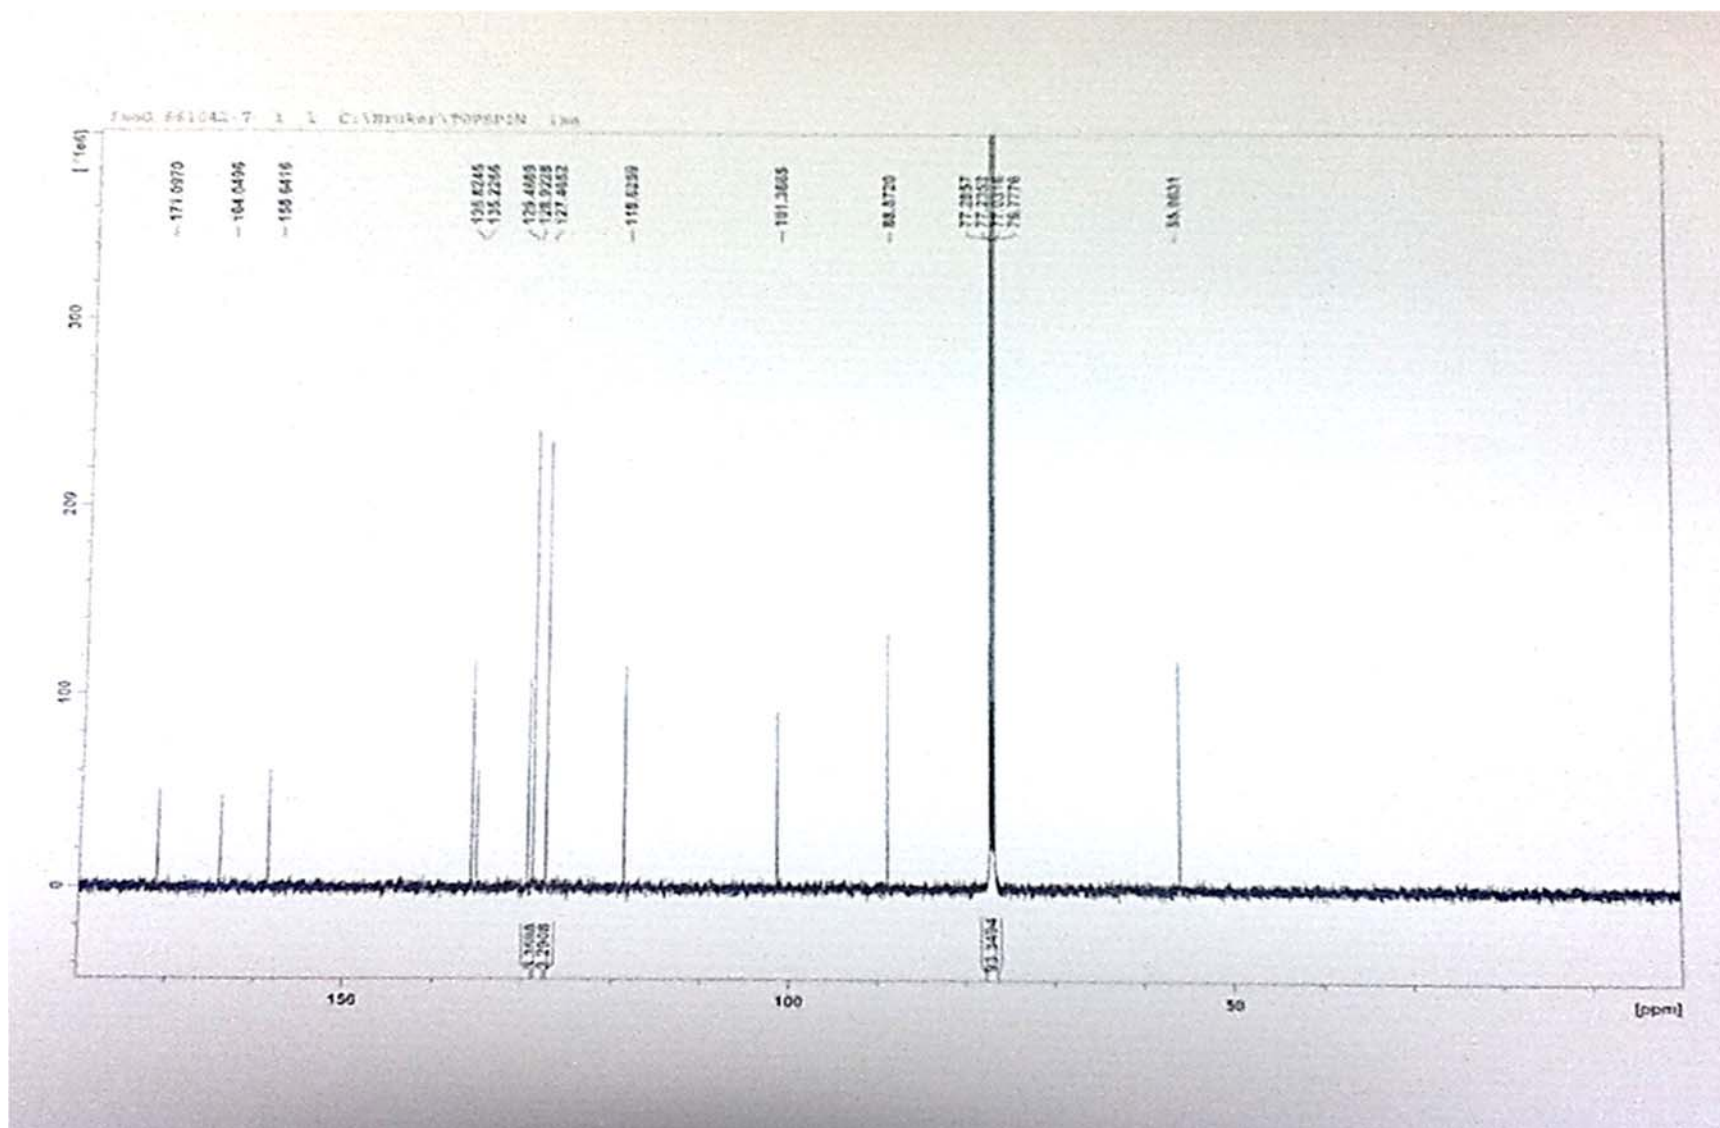

Fig. 8S  $^{13}\text{C}$  NMR of compound 4 in  $\text{CDCl}_3$ .

RA-6-6-13  
Proton

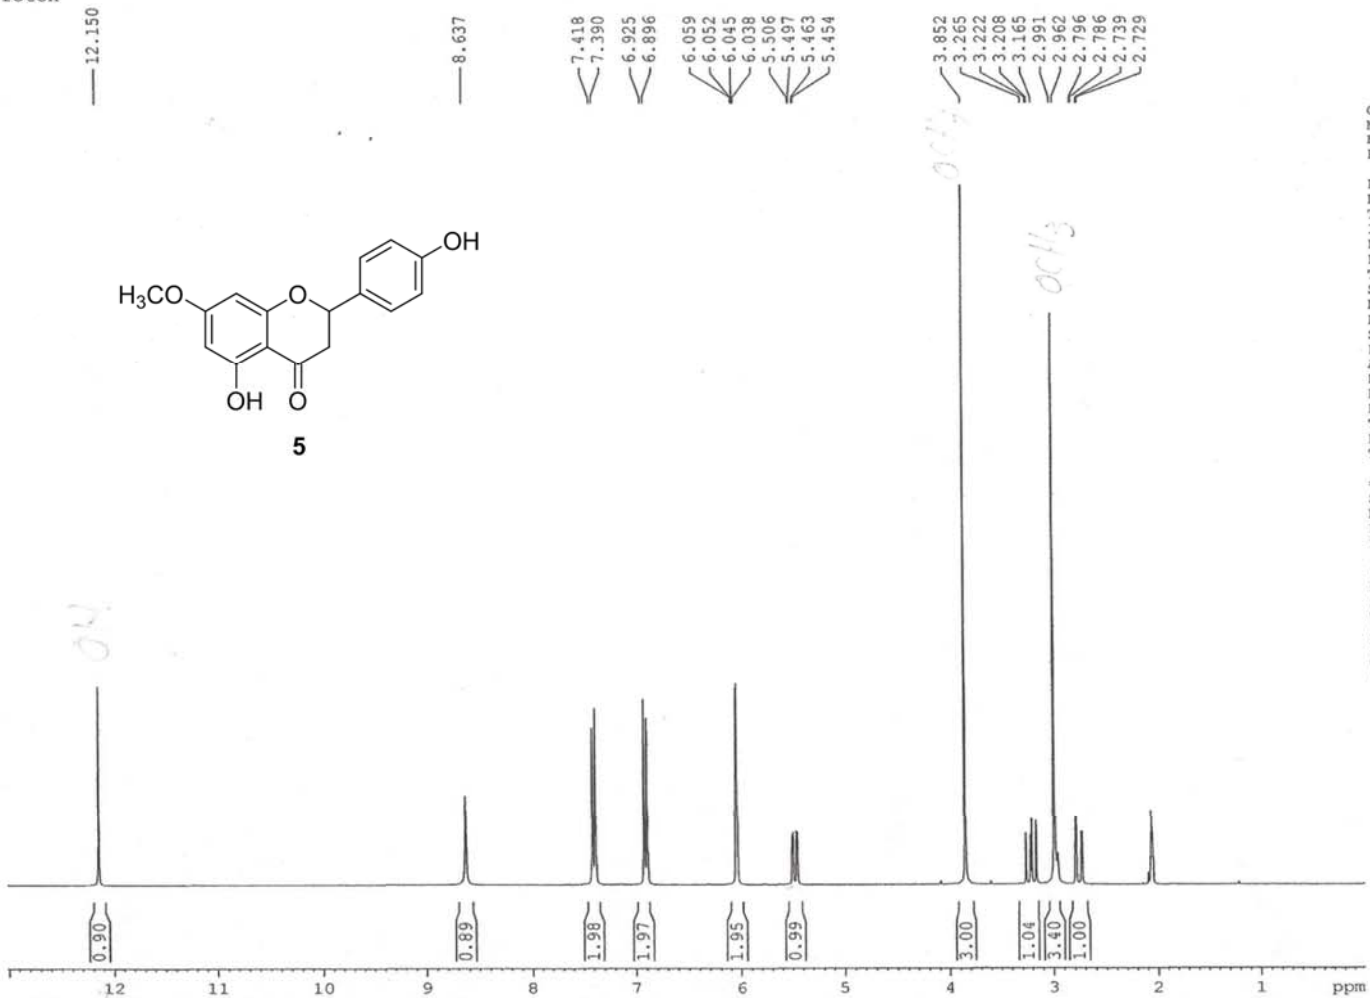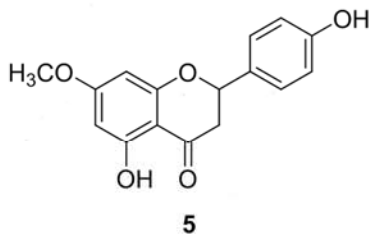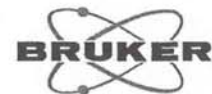

Current Data Parameters  
NAME GISB-RA-6-6-13  
EXPNO 1  
PROCNO 1

F2 - Acquisition Parameters  
Date\_ 20130613  
Time\_ 16.17  
INSTRUM FOURIER300  
PROBHD 5 mm DUL 13C-1  
PULPROG zg30  
TD 65536  
SOLVENT Acetone  
NS 16  
DS 0  
SWH 6103.516 Hz  
FIDRES 0.093132 Hz  
AQ 5.3687091 sec  
RG 31.623  
DW 81.920 usec  
DE 6.50 usec  
TE 296.1 K  
D1 1.00000000 sec  
TD0 1

===== CHANNEL f1 =====  
SF01 300.1698537 MHz  
NUC1 1H  
P1 12.50 usec  
PLW1 11.99499989 W

F2 - Processing parameters  
SI 65536  
SF 300.1680000 MHz  
WDW EM  
SSB 0  
LB 0.30 Hz  
GB 0  
PC 1.00

Fig. 9S <sup>1</sup>H NMR of compound 5 in CD<sub>3</sub>COCD<sub>3</sub>.

RA-6-6-13  
13C Normal

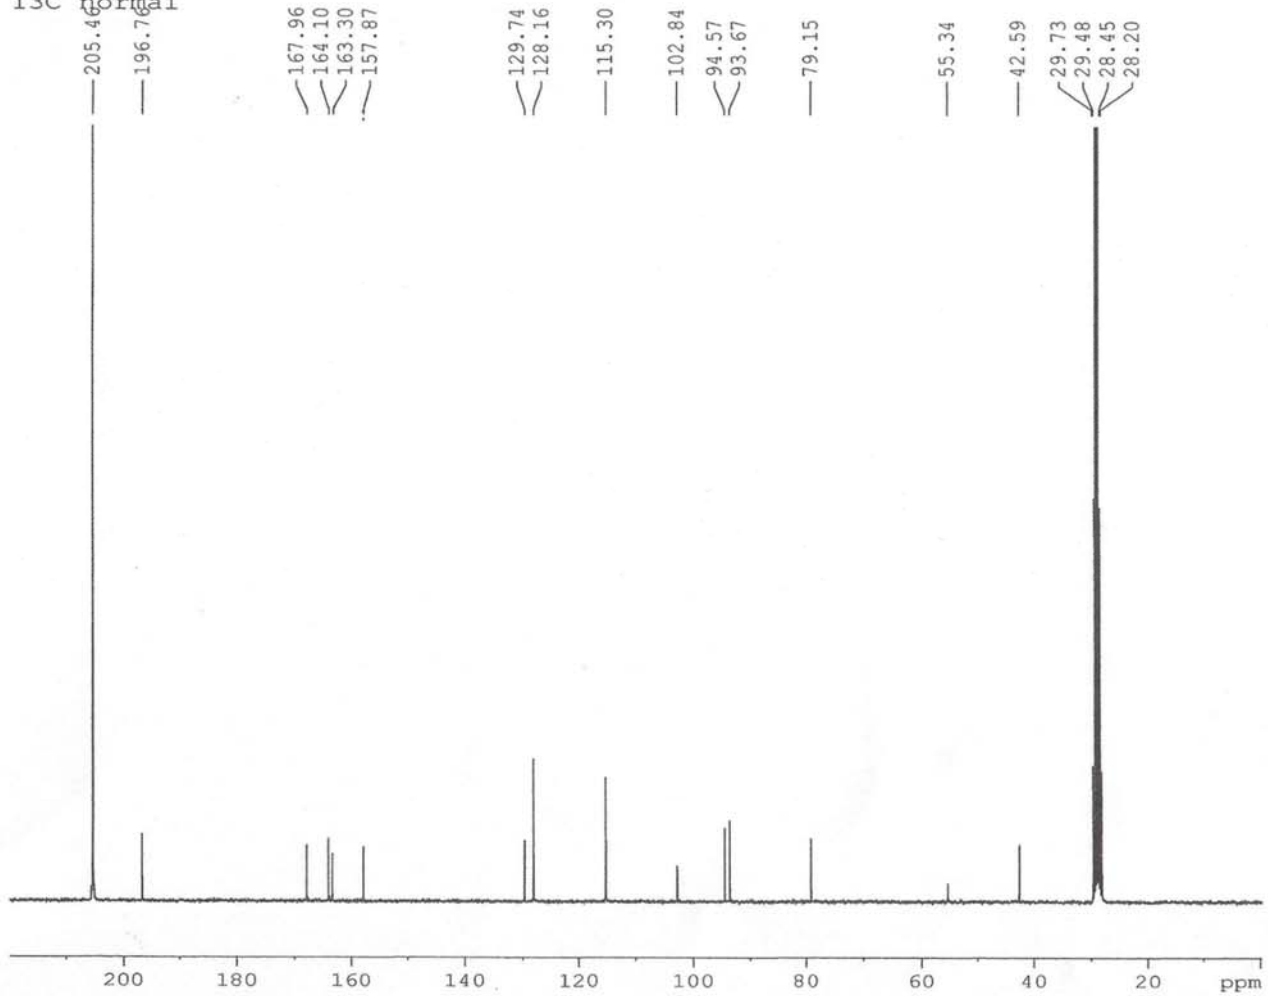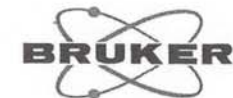

Current Data Parameters  
NAME GISB-RA-6-6-13  
EXPNO 7  
PROCNO 1

F2 - Acquisition Parameters  
Date\_ 20130614  
Time\_ 9.46  
INSTRUM FOURIER300  
PROBHD 5 mm DUL 13C-1  
PULPROG zgpg30  
TD 65536  
SOLVENT Acetone  
NS 2048  
DS 4  
SWH 24414.063 Hz  
FIDRES 0.372529 Hz  
AQ 1.3421773 sec  
RG 501.187  
DW 20.480 usec  
DE 6.50 usec  
TE 296.1 K  
D1 2.00000000 sec  
D11 0.03000000 sec  
D31 0.00001250 sec  
D40 0.02432300 sec  
L4 34  
L5 49  
P32 105.00 usec  
TD0 1

----- CHANNEL f1 -----  
SFO1 75.4848517 MHz  
NUC1 13C  
P1 12.50 usec  
PLW1 25.00300026 W

----- CHANNEL f2 -----  
SFO2 300.1692007 MHz  
NUC2 1H  
CPDPRG[2] waltz16  
PCPD2 105.00 usec  
PLW2 11.99499989 W  
PLW12 0.17000000 W  
PLW13 0.18742000 W

F2 - Processing parameters  
SI 32768  
SF 75.4773040 MHz  
WDW EM  
SSB 0  
LB 1.00 Hz  
GB 0  
PC 1.40

Fig. 10S <sup>13</sup>C NMR of compound 5 in CD<sub>3</sub>COCD<sub>3</sub>.

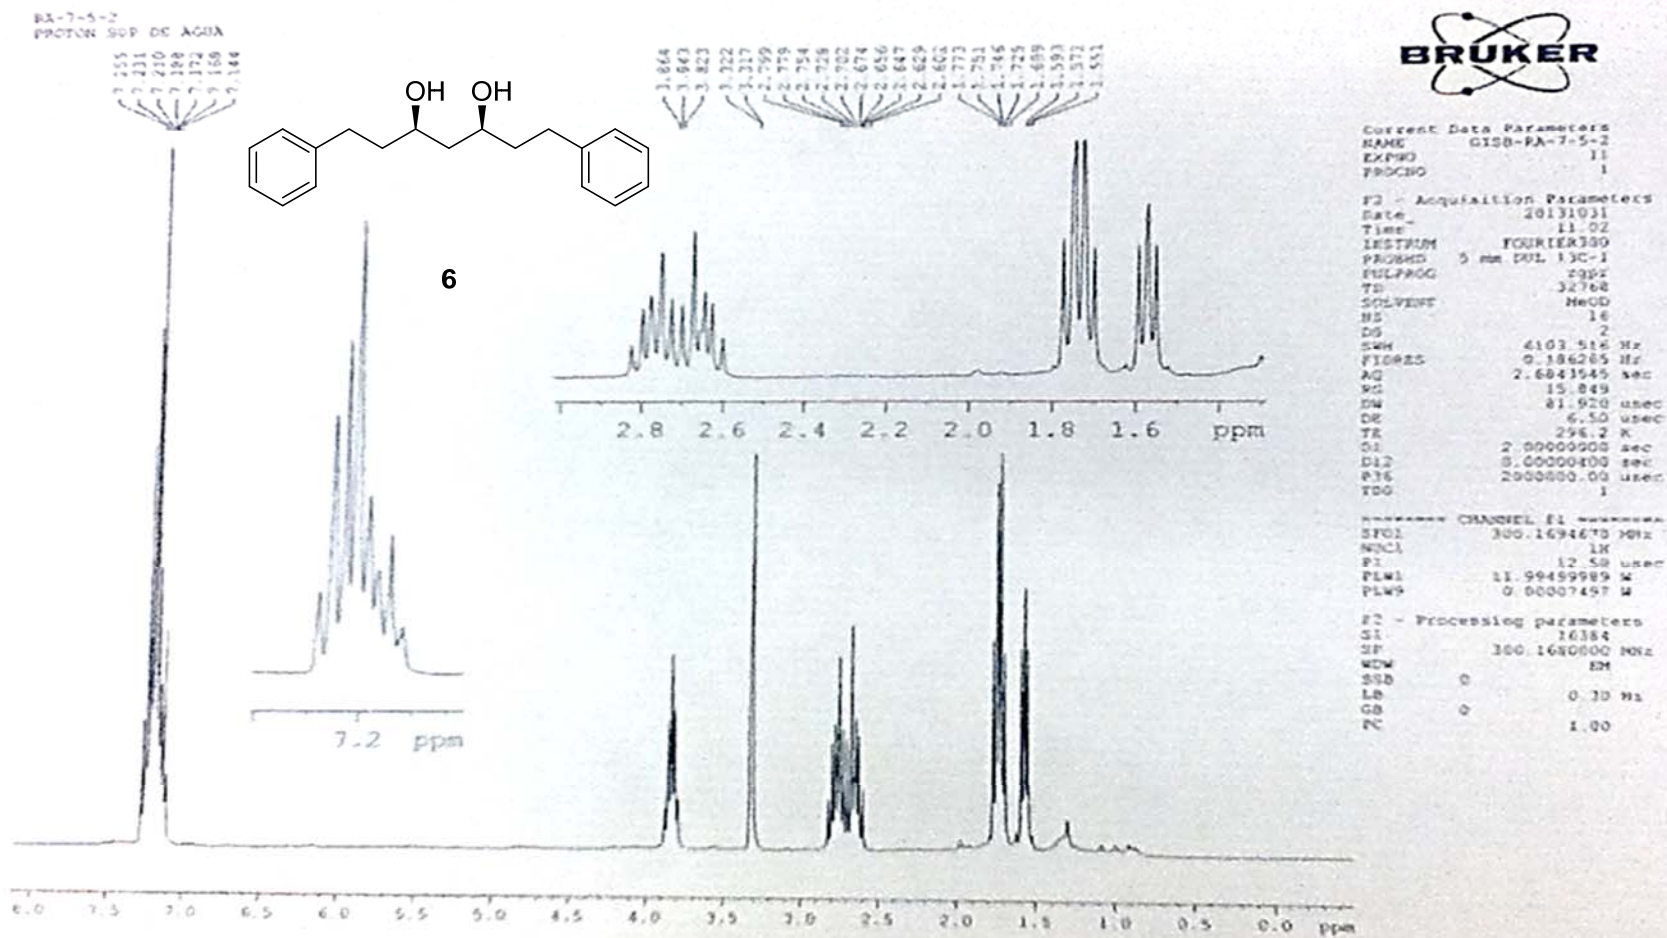

Fig. 11S  $^1\text{H}$  NMR of compound 6 in MeOD.

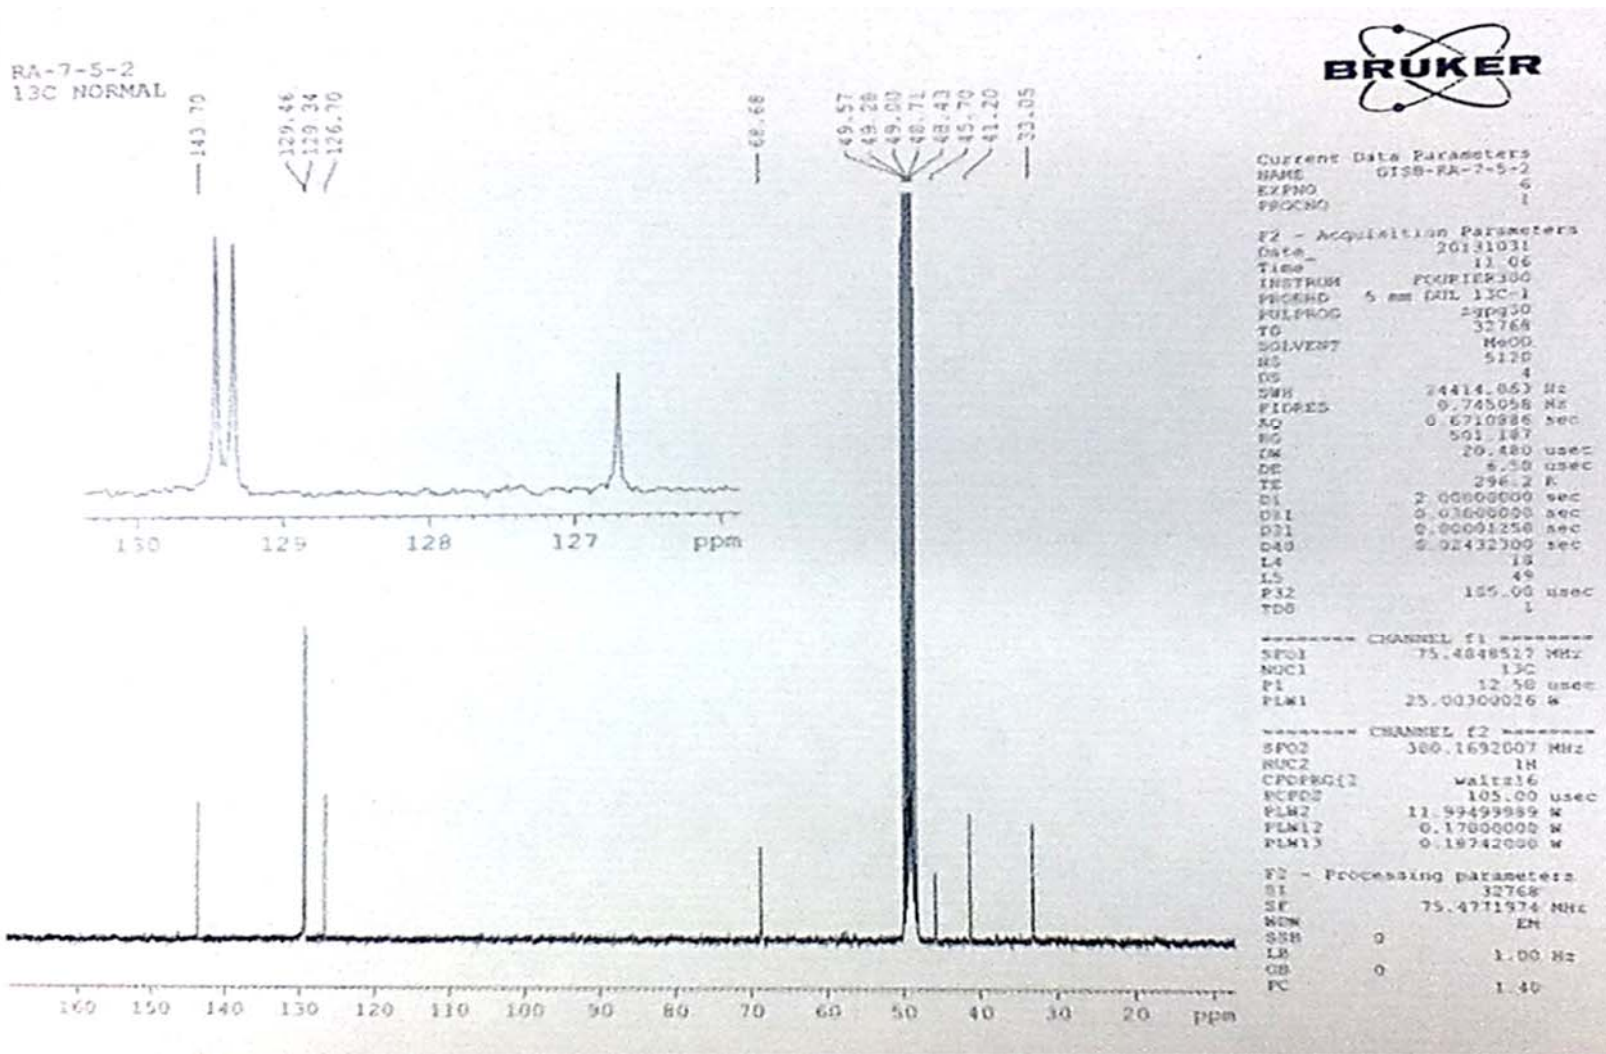

Fig. 12S <sup>13</sup>C NMR of compound 6 in MeOD.
